# Supplementary figures and images for: Hyporheic exchange in recirculating flumes under heterogeneous bacterial and morphological conditions
Source: Springer Nature journal article supplement (doi:10.1007/s12665-021-09472-2), 2021-03-01

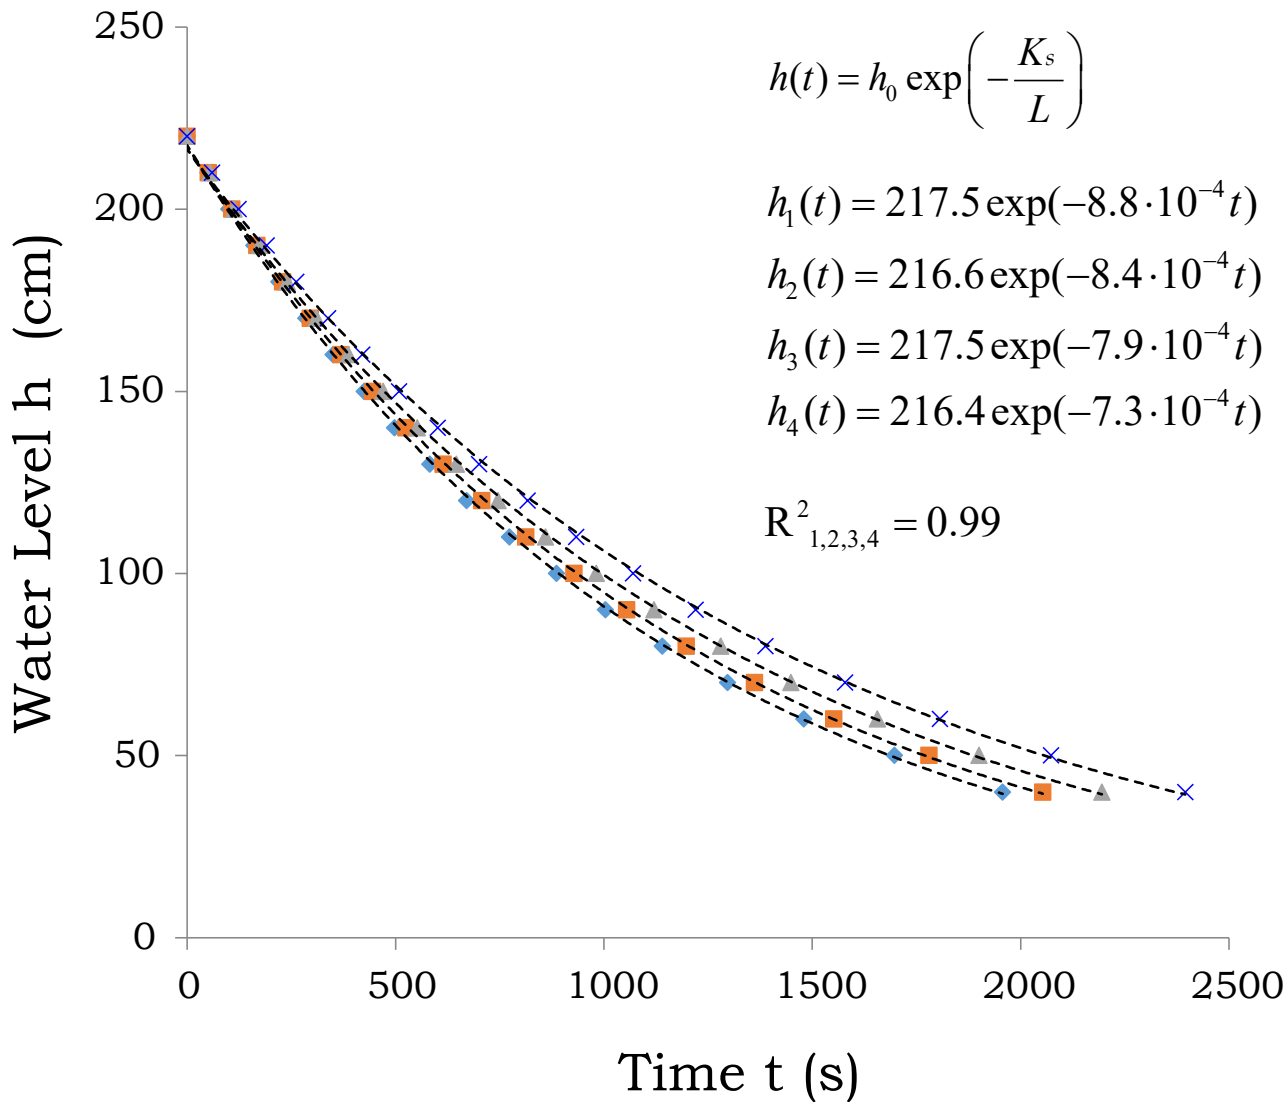

Supplement: MOESM3 [file 18973448]

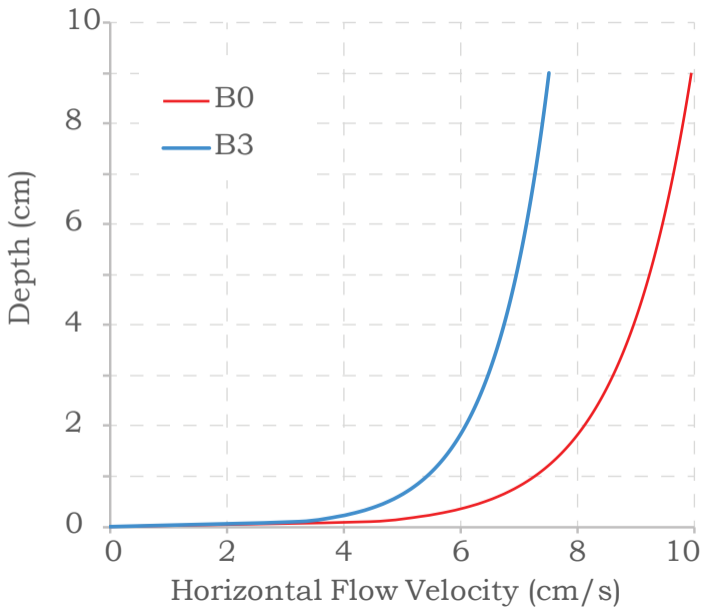

Supplement: MOESM4 [file 18973448]

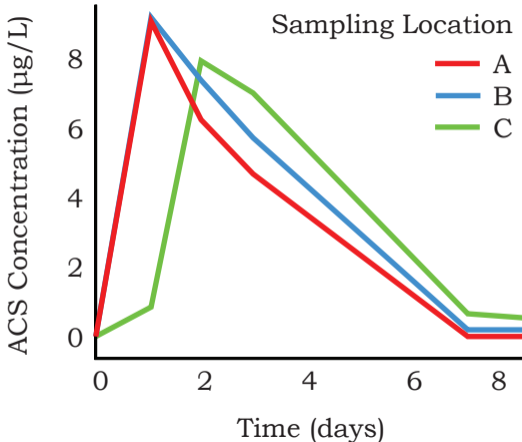

Supplement: MOESM5 [file 18973448]

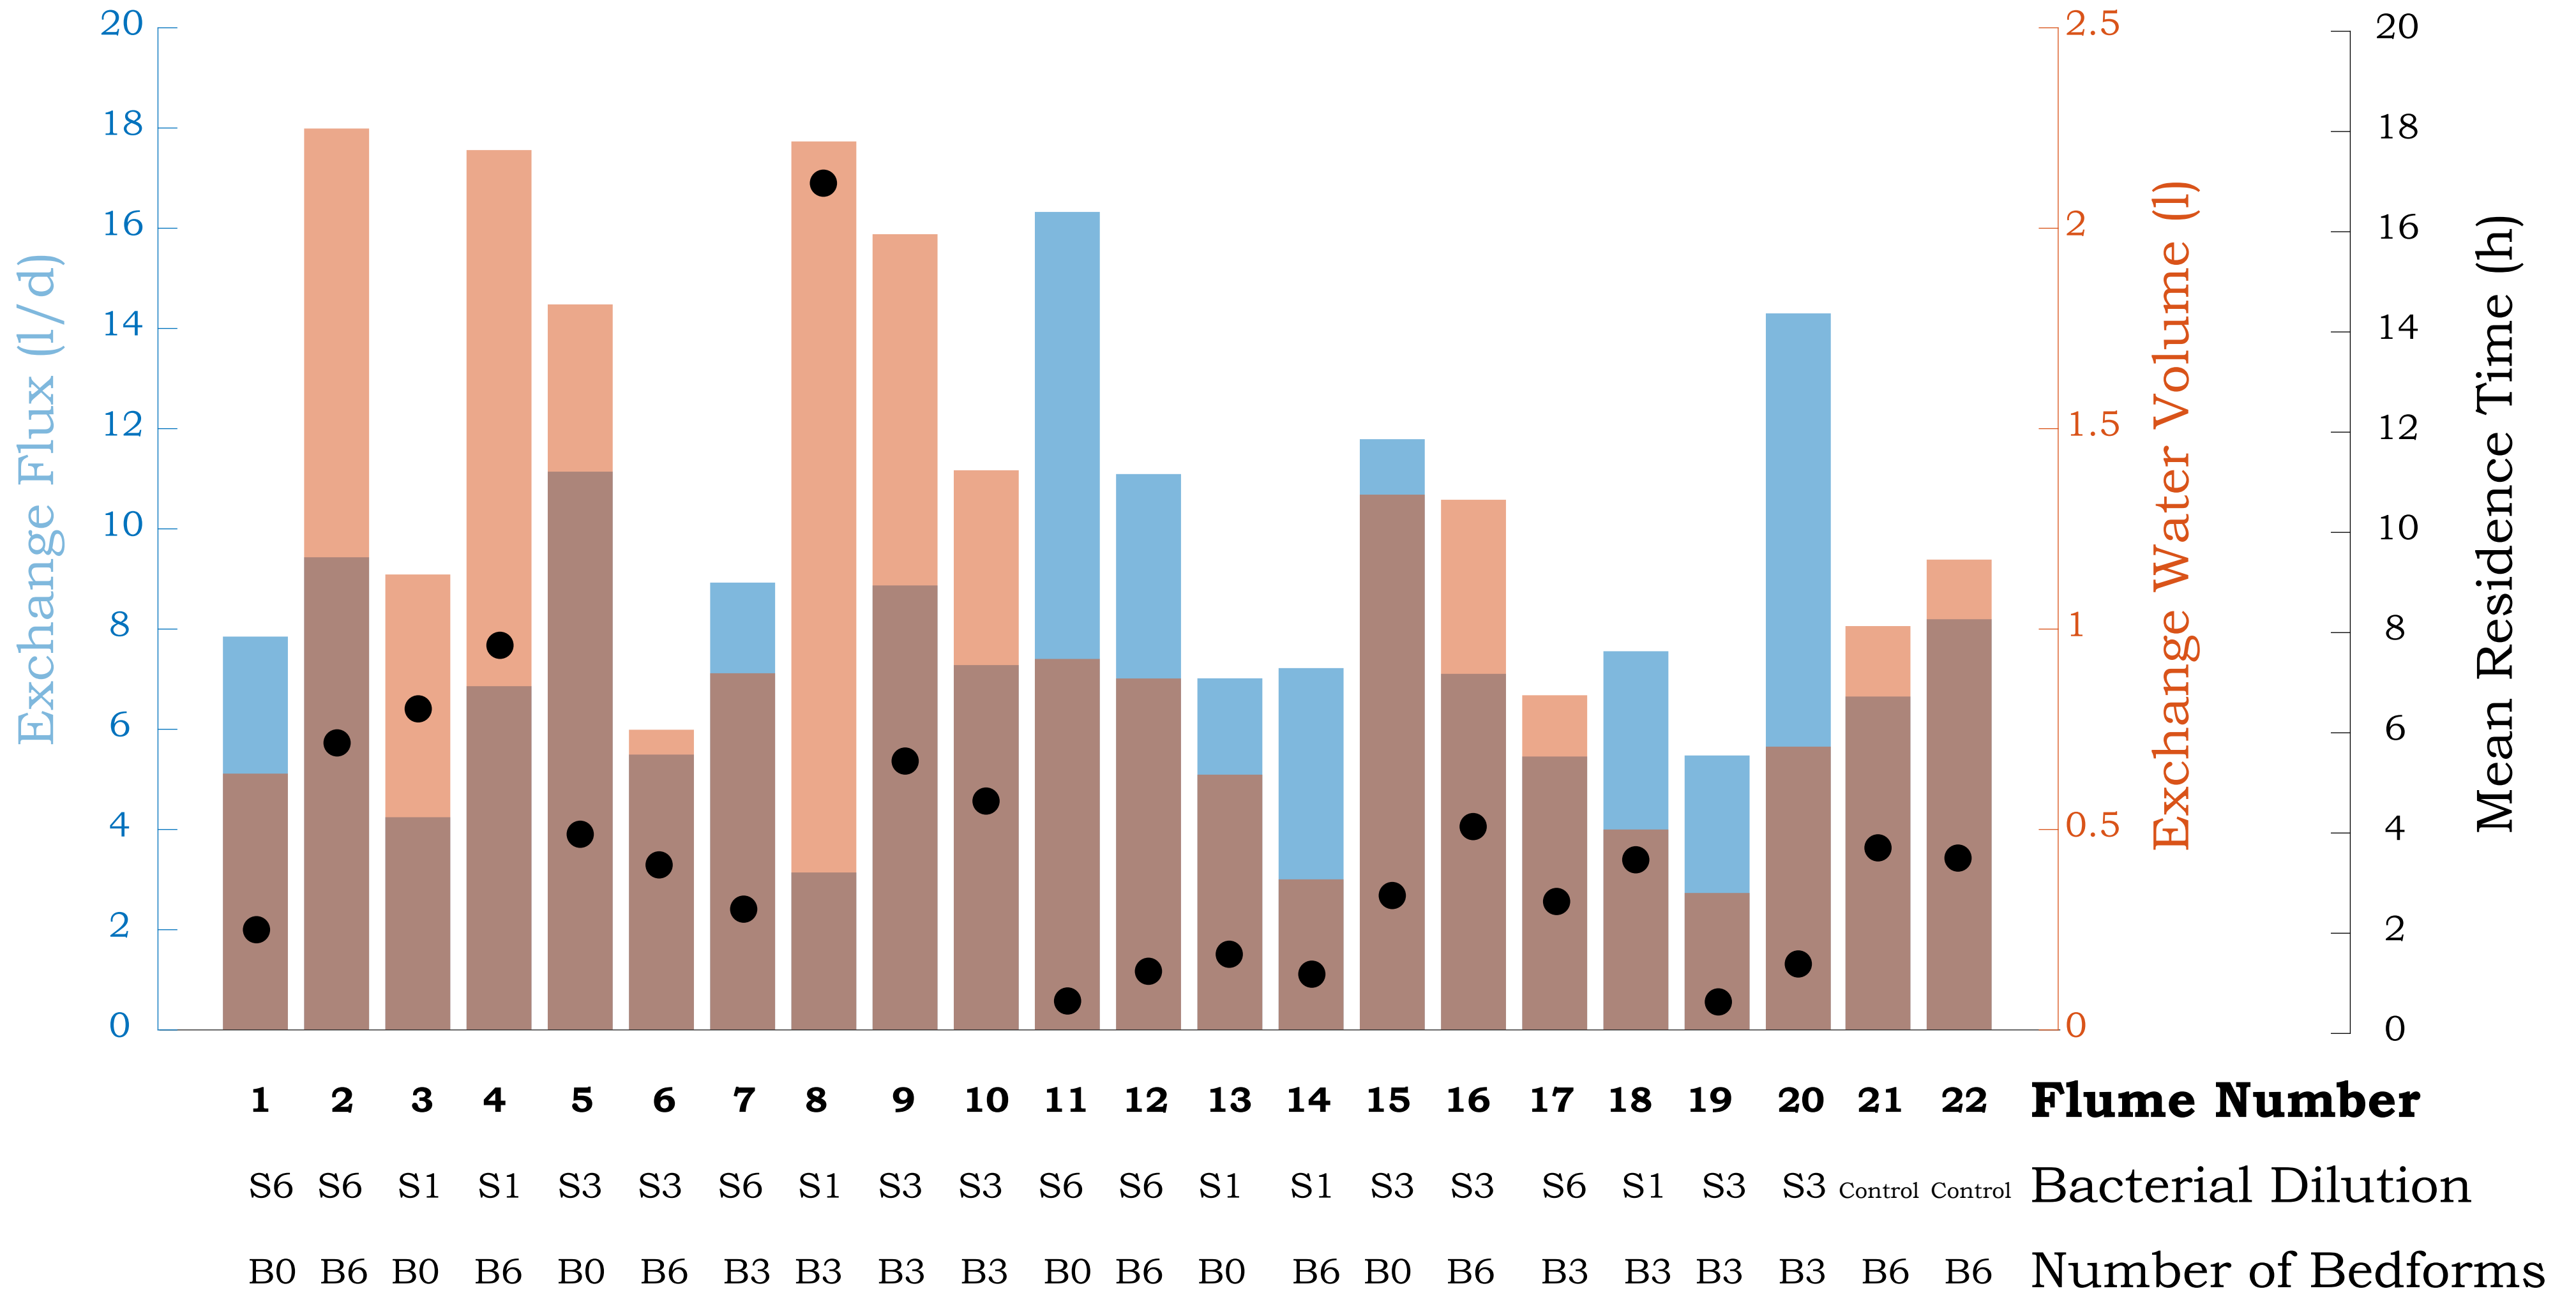

Supplement: MOESM6 [file 18973448]

### B3

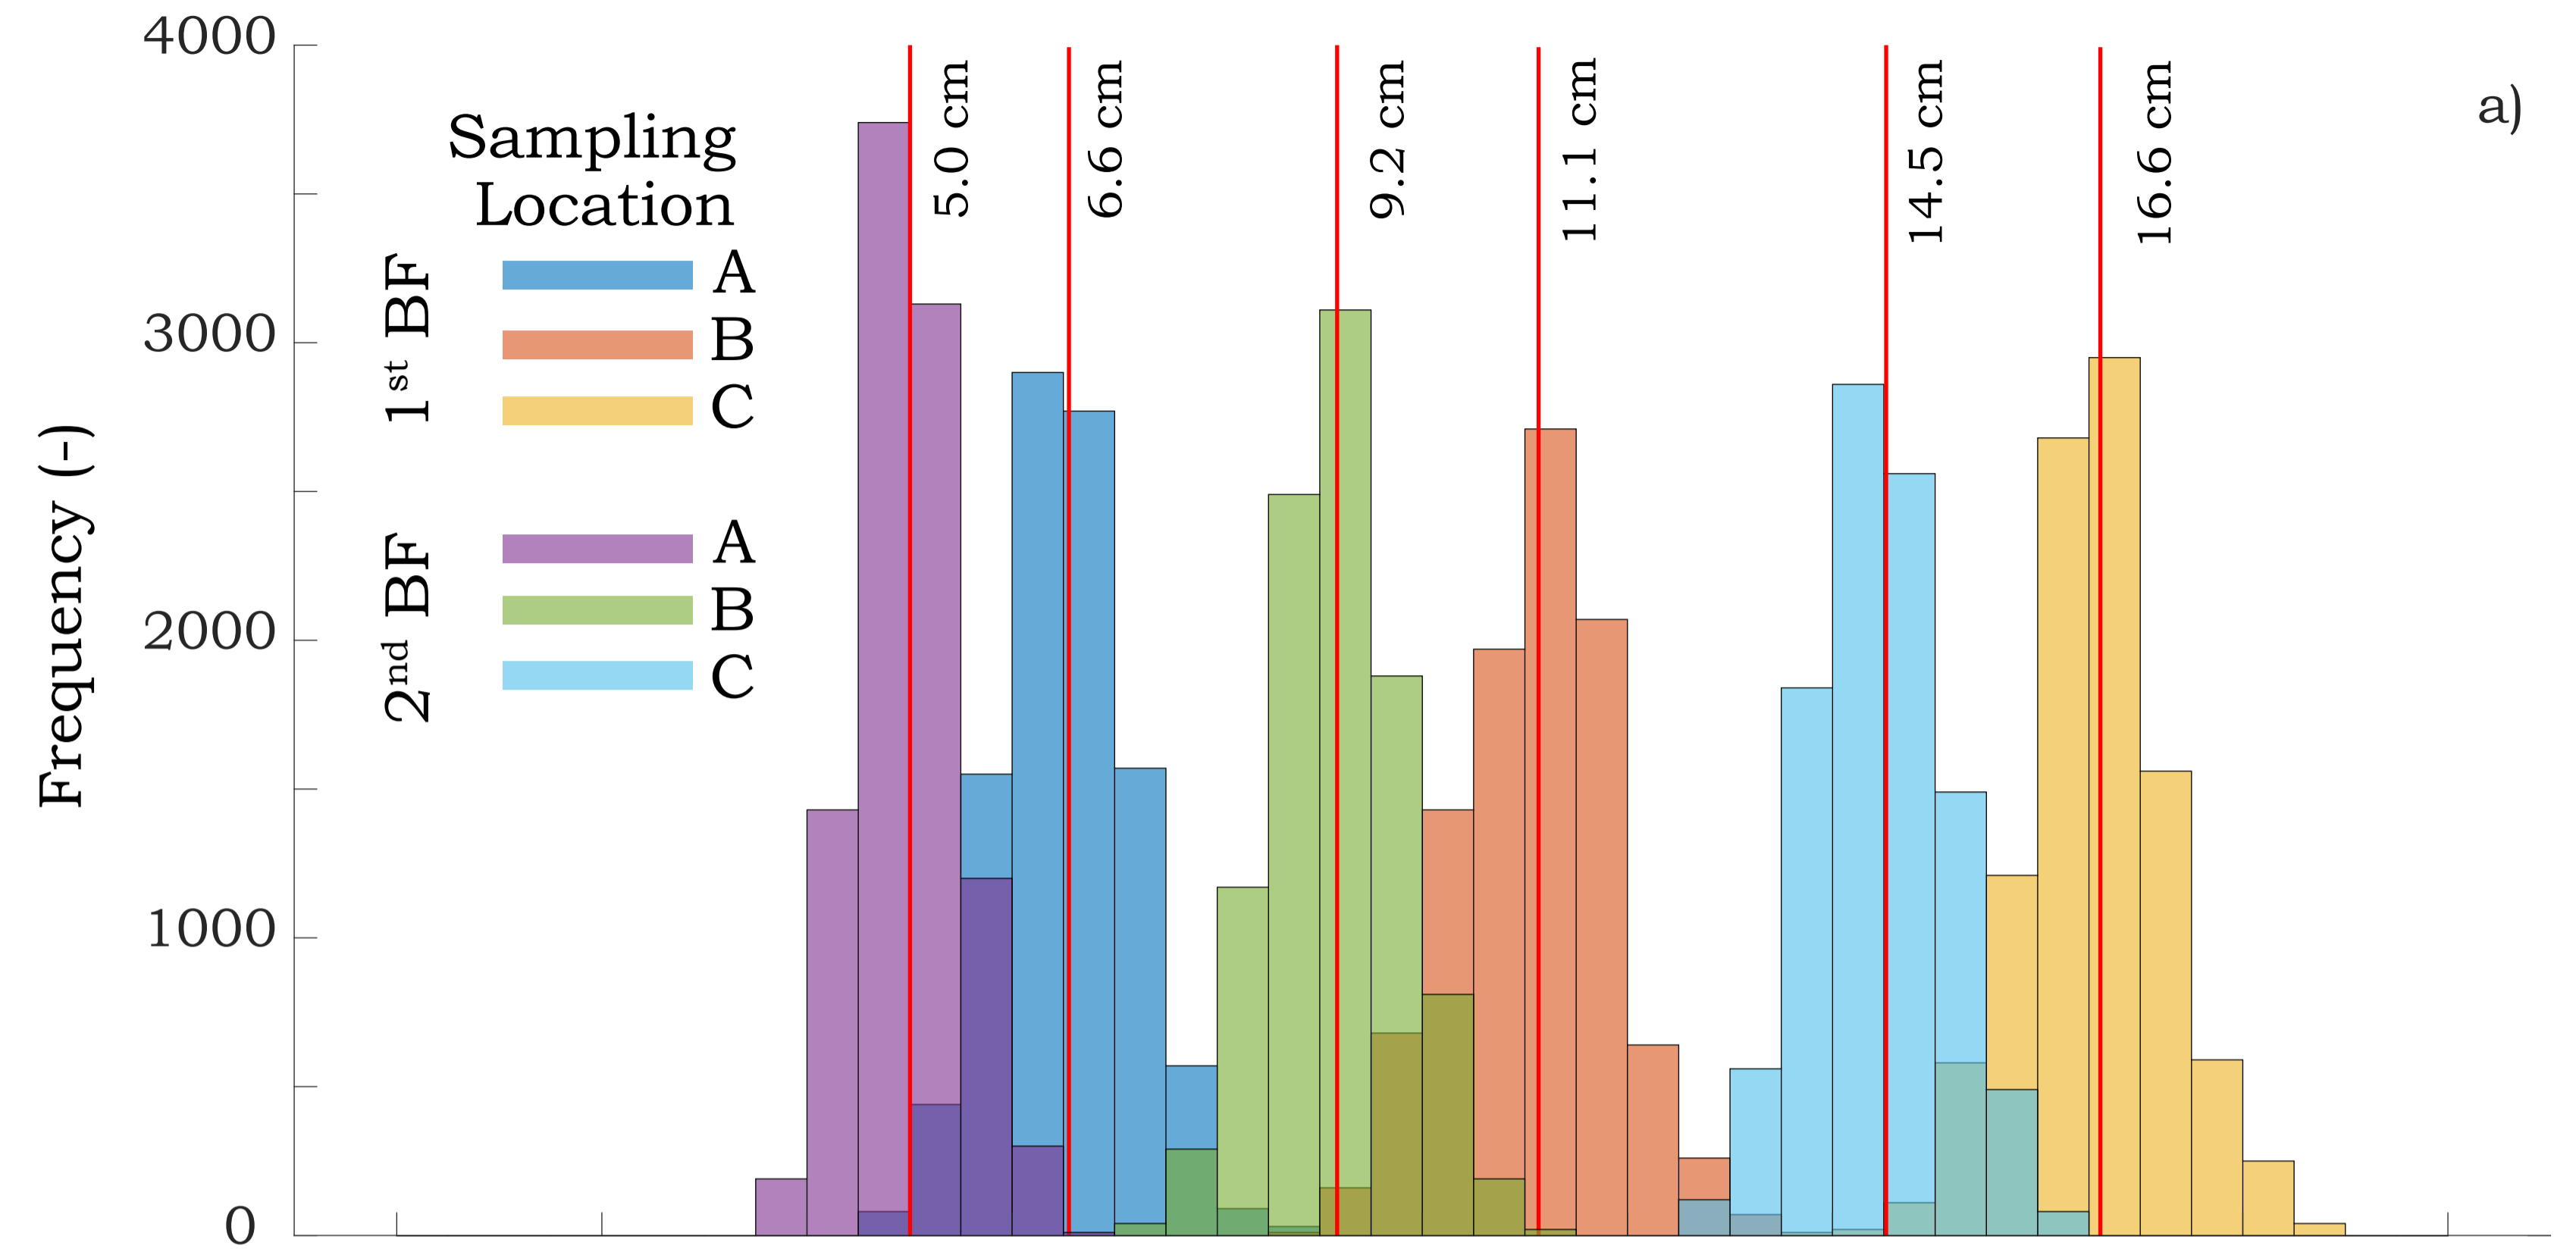

### B6

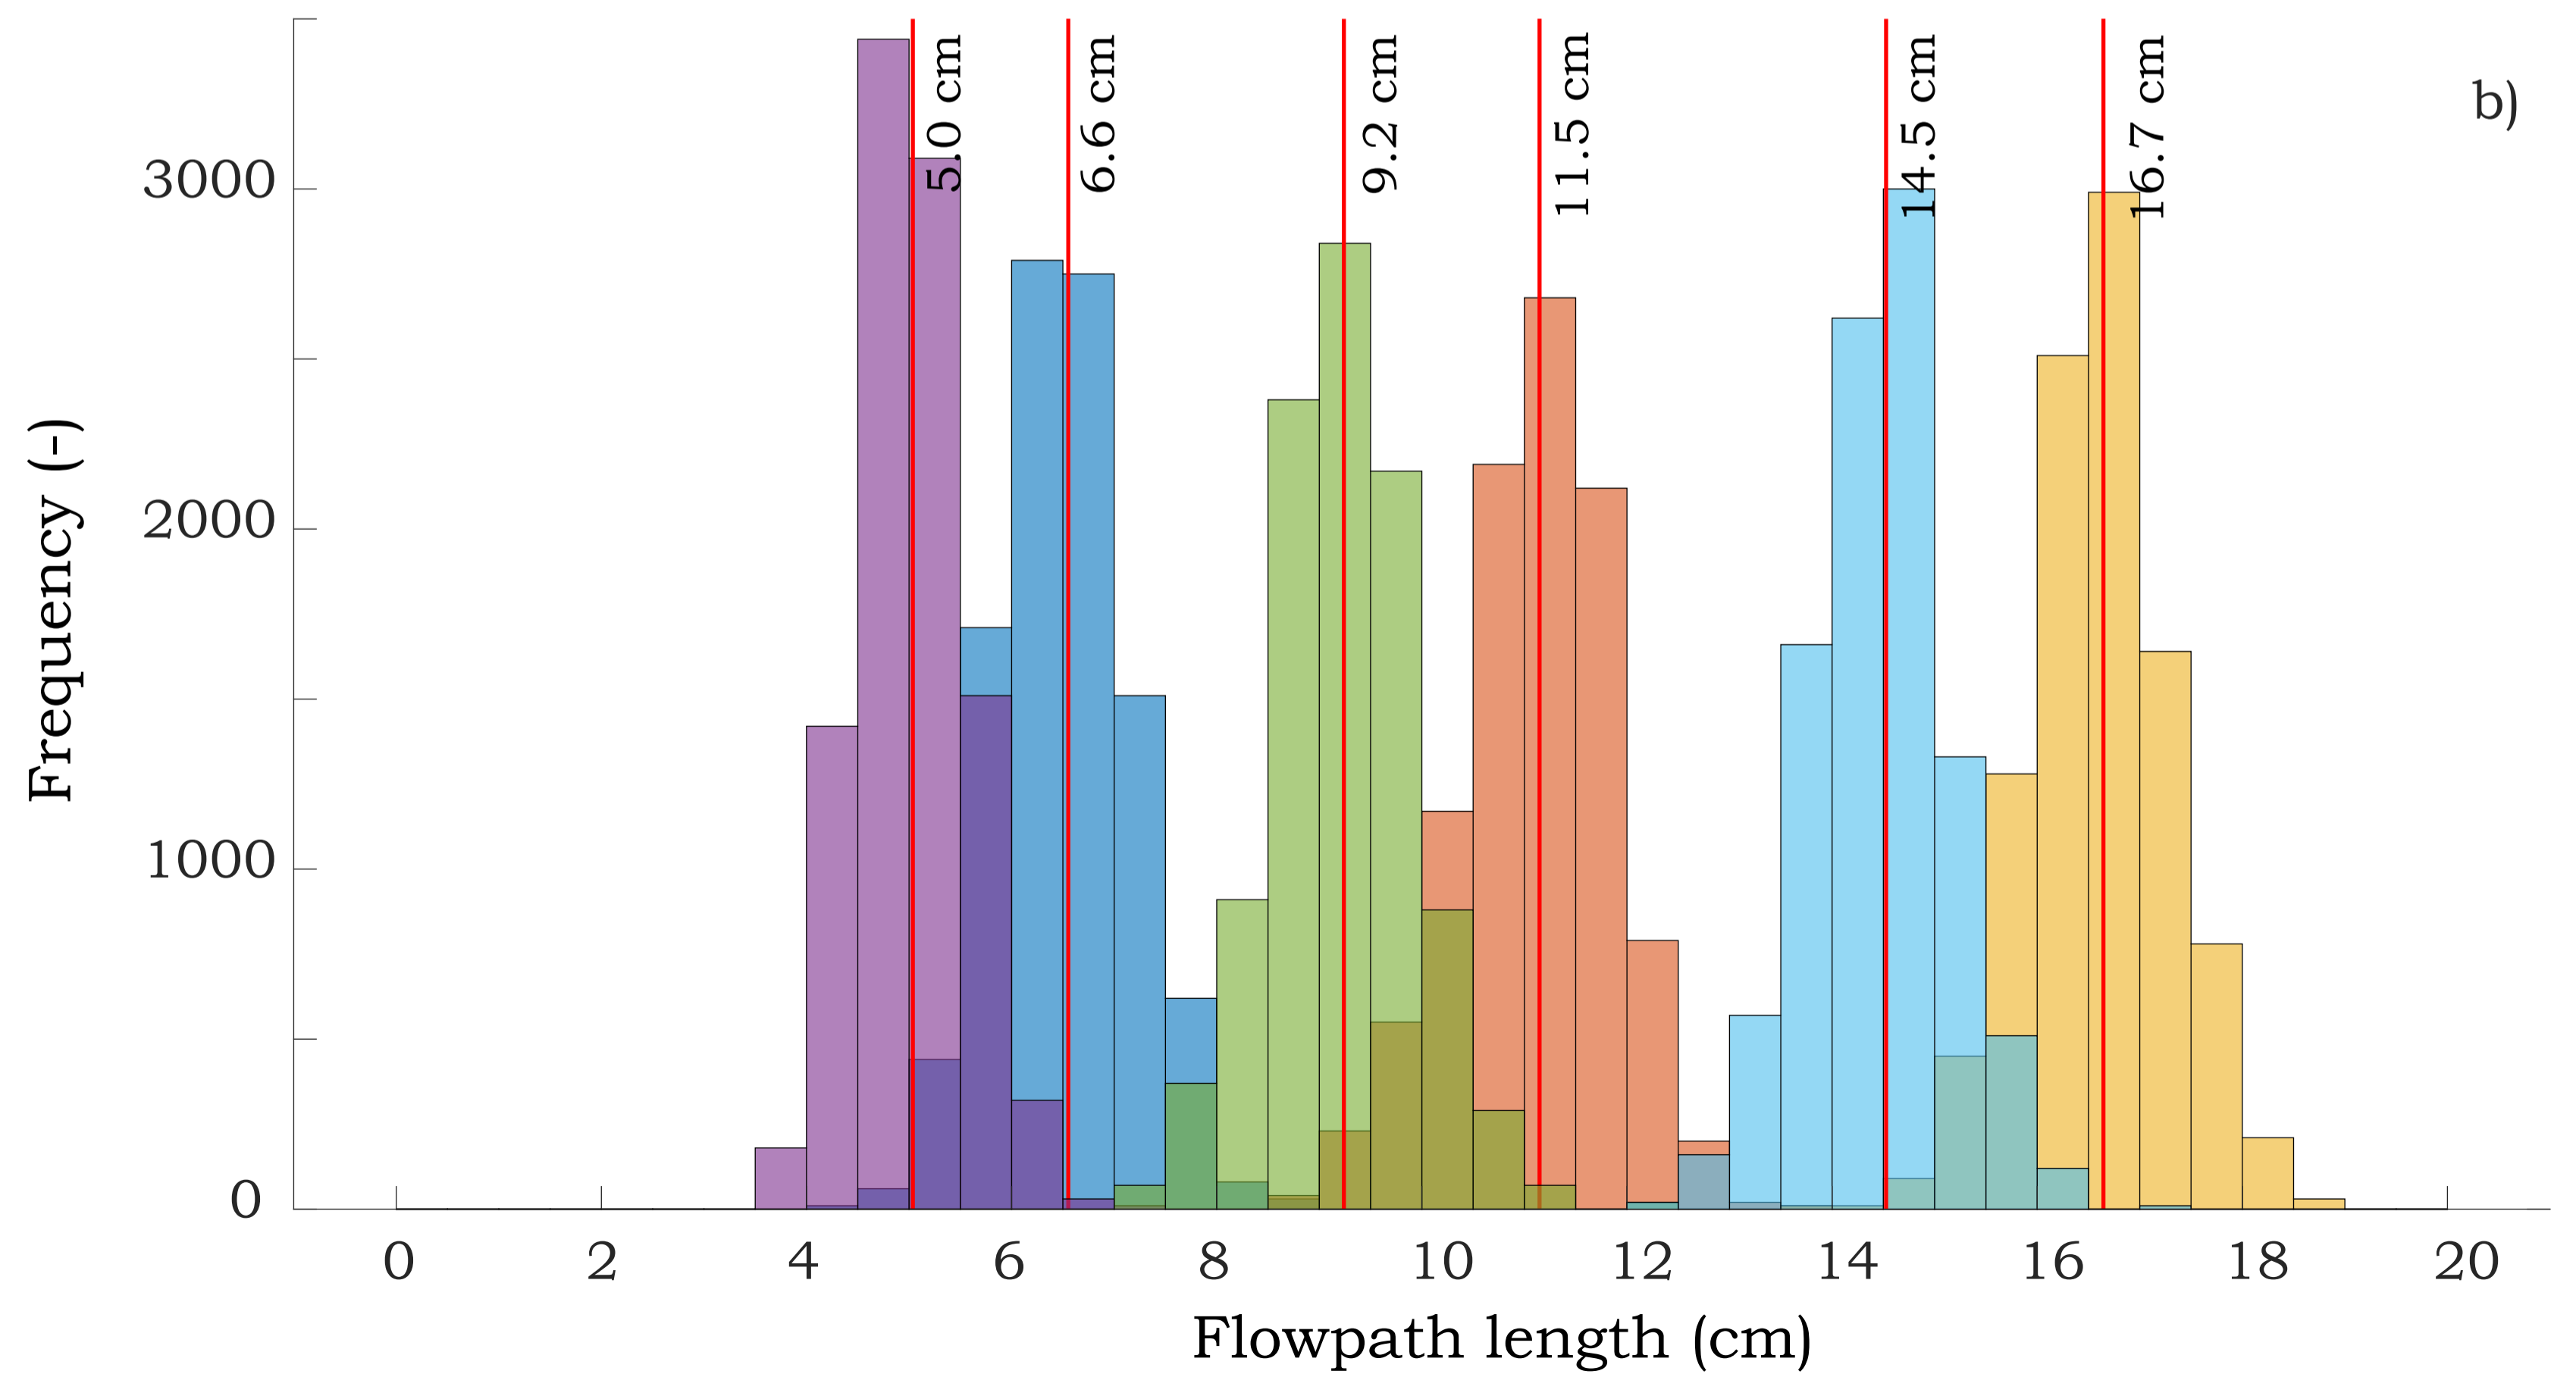

Supplement: MOESM7 [file 18973448]

a)

B6

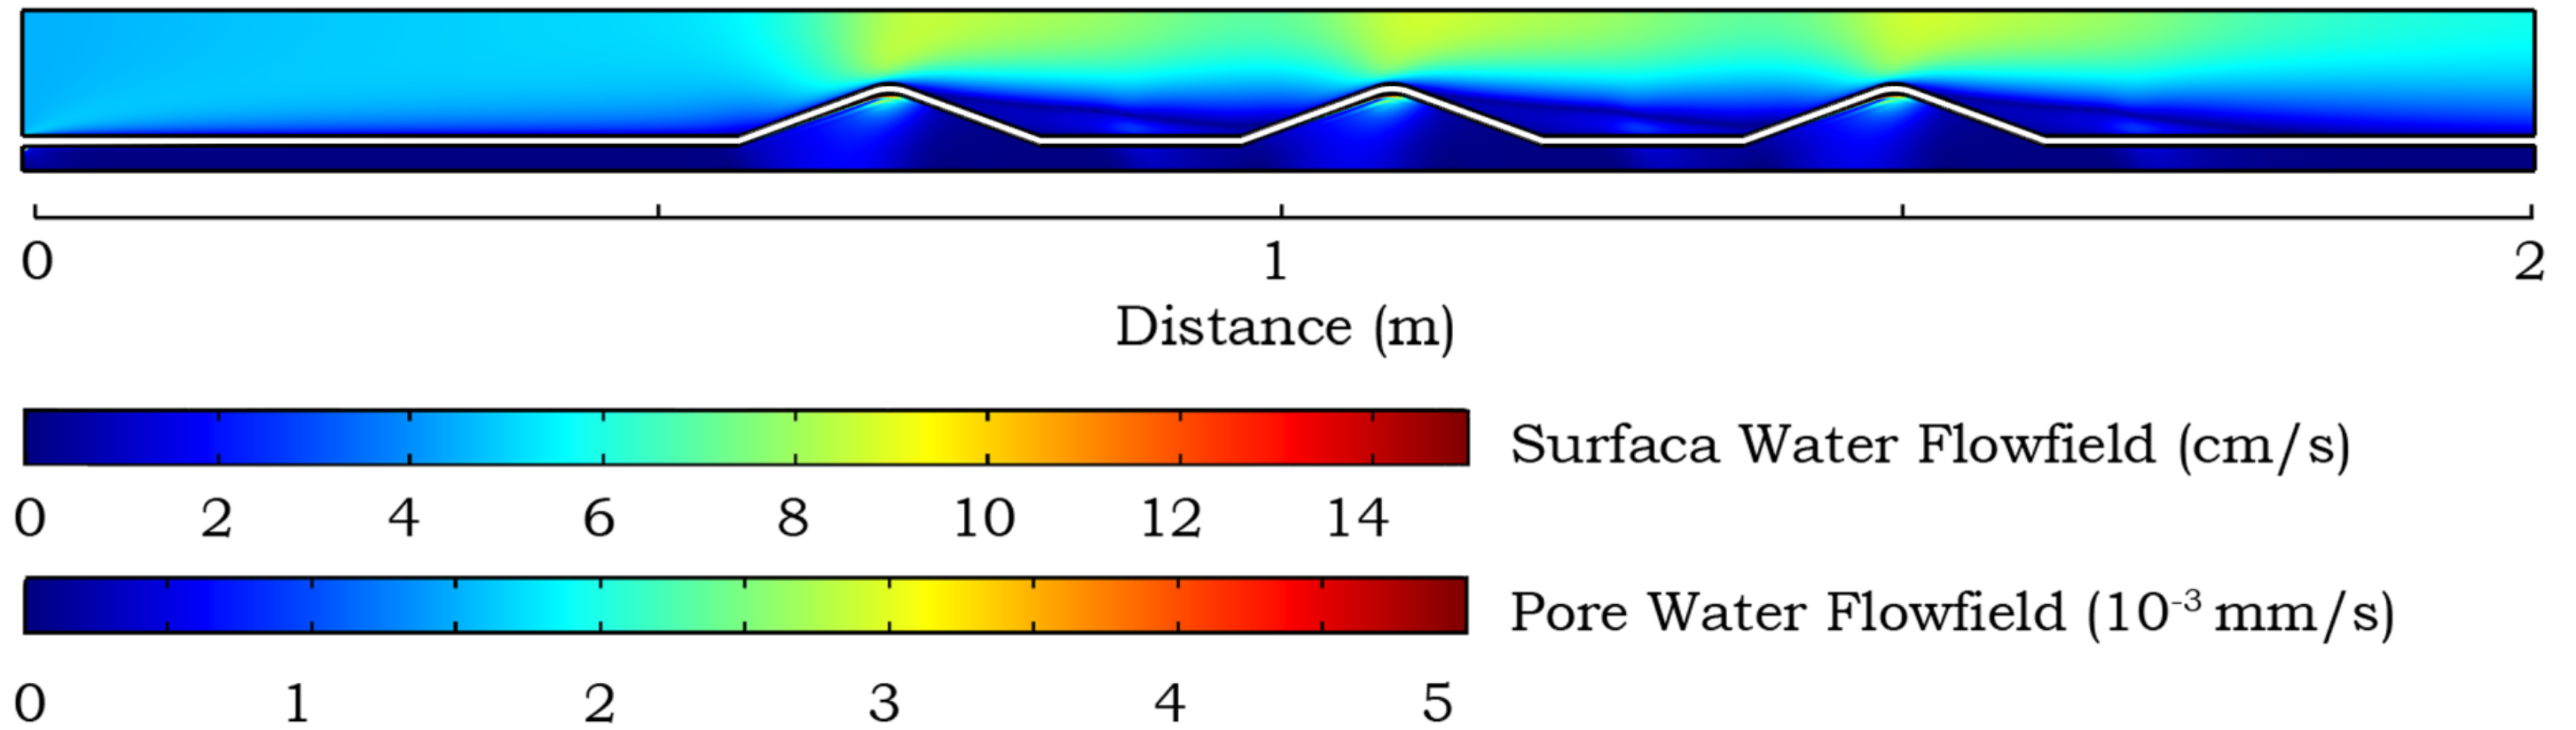

b)

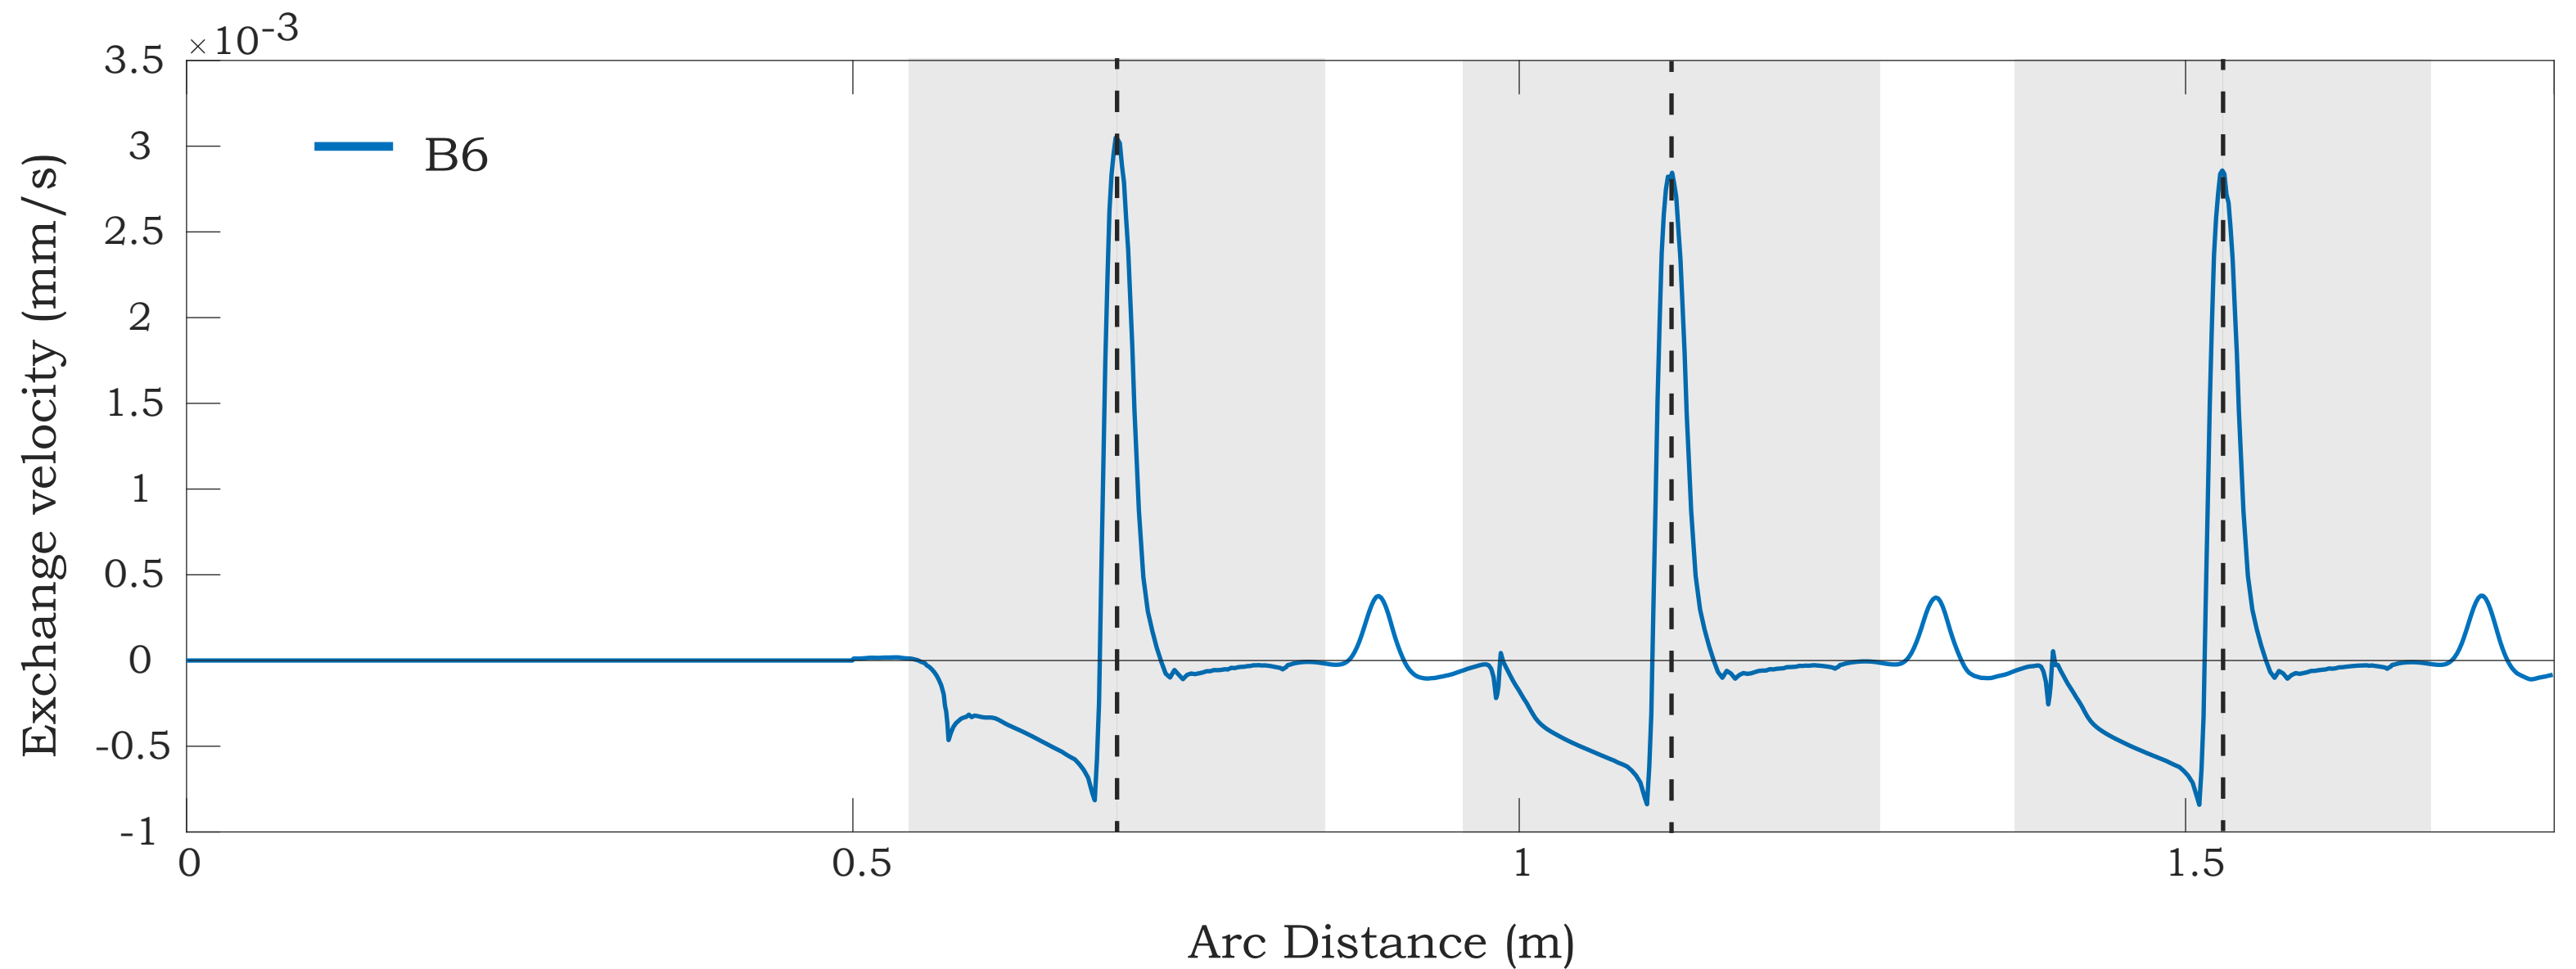

Supplement: MOESM8 [file 18973448]
